# Orthodontic treatment need in Latvia

Andra Liepa\*, Ilga Urtane\*, Stephen Richmond\*\* and Frank Dunstan\*\*\*

\*Department of Orthodontics, Latvian Academy of Medicine, Riga, Latvia, Departments of \*\*Dental Health and Biological Sciences and \*\*\*Epidemiology, Statistics and Public Health, University of Wales College of Medicine, Dental School, Cardiff, UK

**SUMMARY** Measuring the prevalence of malocclusion and treatment need in a population is useful for the planning of orthodontic services. In addition, knowledge concerning the attitudes of patients to malocclusion is becoming increasingly important in orthodontics. Without a satisfactory estimate of the need and demand for treatment it is difficult to develop and organize a meaningful service. The aims of this investigation were to estimate the need for orthodontic treatment in 12–13-year-old school children in urban and rural schools in Latvia. Five hundred and four school children aged 12–13 years were examined using the Index of Complexity, Outcome and Need (ICON). The children were invited to complete a questionnaire about treatment need and their appearance. The survey was carried out in four urban and five rural school settings.

There were no statistically significant differences in treatment need between rural and urban settings or between boys and girls. However, there was a difference in ICON scores between Riga and Daugavpils, with a greater need for treatment in Daugavpils. Individual responses to questionnaires illustrated a correlation between individuals who expressed dissatisfaction with the arrangement of their teeth and treatment need according to the ICON score.

The overall prevalence of individuals needing orthodontic treatment in Latvia was 35.3 per cent, but this figure masked considerable variation between schools. For example, a greater need was found in Daugavpils than in Riga. This difference is not fully explained but could be due to genetics, the individuals in Daugavpils being mainly of Russian origin. The individuals' perception of the arrangement of teeth and the need for treatment correlated significantly with the ICON score.

## Introduction

Measuring and recording the prevalence of malocclusion and treatment need in a population is useful for the planning of orthodontic services. In addition, knowledge about the attitude of patients to malocclusion is becoming increasingly important in orthodontics. Without a satisfactory estimate of the need and demand for treatment it is difficult to develop and organize a meaningful orthodontic service.

Occlusal indices (Index of Orthodontic Treatment Need, IOTN; Peer Assessment Rating, PAR; Norwegian Orthodontic Treatment Index, NOTI) have been used successfully in many countries around the world and have provided useful information on treatment need and provision of orthodontic services (Espeland *et al.*, 1992; Richmond, 1993; Richmond and Andrews, 1993; Birkeland *et al.*, 1996).

Orthodontic treatment is often carried out to improve the patient's dental appearance, hence the individual's attitude to their own malocclusion is an important factor in determining treatment need (Shaw *et al.*, 1991). The main factors influencing the decision for treatment are aesthetic improvement and psychological aspects, although the patient's perception of malocclusion is often not in agreement with objective measurements.

Orthodontists tend to recommend 10–12 per cent more treatment than lay persons (Vally, 1997). Malocclusion is a continuum ranging from an ideal occlusion to considerable deviation from normal. Assessing cut-off points for those needing and not needing treatment is problematic. Factors such as the severity of malocclusion, the appliance type to be employed, the skill of the operator, and the patient's co-operation have to be taken into account. The level of need varies widely and depends on the criteria employed: age, gender, type of population studied, and the cut-off levels for severity of malocclusion. Orthodontic treatment need estimates range from 27.5 to 76.7 per cent, although the demand for treatment is reported to be much lower, ranging from 2 to 47 per cent (Richmond, 2000). Nevertheless, occlusal indices have enabled quantification of need. They are not always comparable (Banack *et al.*, 1972; Albino *et al.*, 1978; Järvinen and Väättäjä, 1987). Very few occlusal indices have been developed for international use. The Index of Complexity, Outcome and Need (ICON) has been developed (Daniels and Richmond, 2000) based on the average opinion of 97 practising specialist orthodontists from nine countries (Richmond and Daniels, 1998a,b). It is a single assessment method to quantify orthodontic treatment complexity, outcome and need. The ICON consists of five components: the Aesthetic Component (AC), upper

and lower crowding/spacing assessment, presence of a crossbite, degree of incisor open bite/overbite, and fit of the teeth in the buccal segment in terms of the anterior-posterior relationship. Each component can be measured on study casts as well as on patients. The practical application of the index is simple and takes approximately one minute for each case.

The aim of this investigation was to estimate the need for orthodontic treatment in 12–13-year-old school children in urban and rural schools in Latvia.

### Subjects and methods

Five hundred and five school children aged 12–13 years were examined using the ICON index (Appendix 1). The children were also invited to complete a questionnaire about treatment need and their appearance (Appendix 2). The survey was carried out in four urban schools (Riga x2, Daugavpils, Ventspils) and five rural schools (Saldus, Madona, Limbaži, Jelgava, Valmiera) according to the World Health Organisation ICS II criteria (World Health Organisation, 1993).

One orthodontist (AL) screened all the children using the ICON in a dental setting in the schools. The need for orthodontic treatment was defined as having an ICON score of 44 and greater.

### Statistical analyses

The proportions of children in different schools needing treatment, as defined by having an ICON score of at least 44, were compared using a Chi-square test. ICON scores between the schools and settings were compared using one-way analysis of variance, having tested the scores for normality. Tukey's multiple comparison method was used to make pairwise comparisons.

The differences in the responses to the questionnaires in the schools and settings were tested using Levene's test for equality of variances, *t*-test for equality of means, and Mann–Whitney tests. Correlations were also undertaken and a forward variable logistic regression analysis was employed to explore questions in relation to those individuals needing and not needing treatment.

### Results

The examiner was calibrated in the use of the ICON using 30 dental casts. The mean difference from the gold standard was less than 5 ICON points and the root mean square less than 9 ICON points. There was a 100 per cent response rate for the study. The prevalence of malocclusion for the eight schools is shown in Figure 1. The need for treatment, according to an ICON score of at least 44, ranged from 27.5 to 58.3 per cent. The differences between these percentages were statistically significant ( $P < 0.01$ ). There were no significant differences between

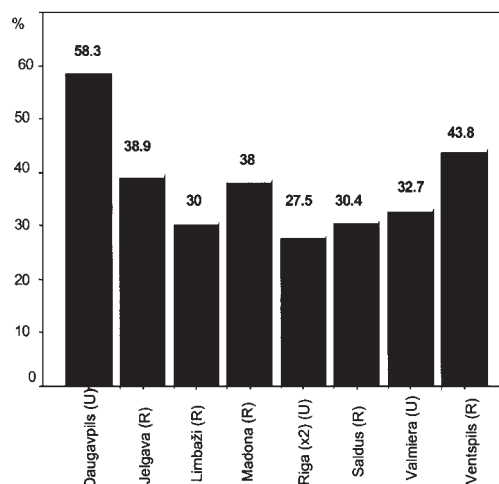

**Figure 1** Percentage need for orthodontic treatment in nine urban (U) and rural (R) settings in Latvia using the ICON.

urban and rural areas, with 34 per cent of subjects in rural areas and 37 per cent in cities needing treatment. Thirty-two per cent of boys needed treatment, compared with 37 per cent of girls, but this difference was not significant.

The actual ICON score contains more information than simply whether the score is at least 44. The box plot (Figure 2) shows the distribution of scores in the various schools. Analysis of variance confirmed that there were no differences between urban/rural areas and/or between boys and girls. However, it did show that there were significant differences between schools; the multiple comparison tests indicated that the difference between Riga, with a mean of 35.6, and Daugavpils, with a mean of 48.5, was significant ( $P < 0.001$ ).

With regard to the questionnaire, the responses were compared between those individuals needing and those

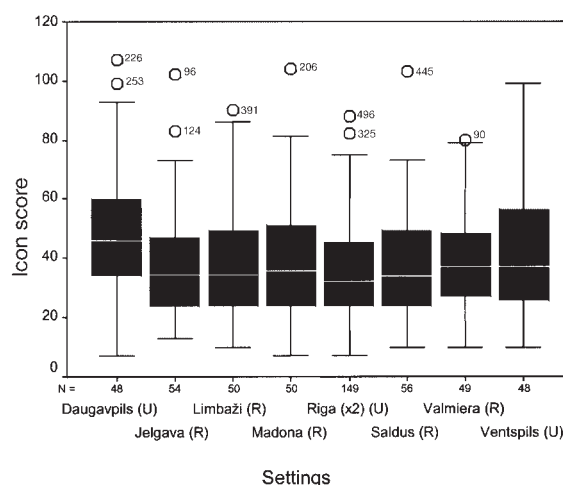

**Figure 2** Distribution of ICON scores (box plots) for the nine urban (U) and rural (R) settings in Latvia. (The box shows the 25th to 75th percentile with the black line the mean score. The whisker represents the smallest and largest outlying values. The circles and numbers represent the outliers.)

not needing treatment according to the ICON. Statistically significant differences (using non-parametric Mann–Whitney tests) occurred with respect to questions 1, 2, and 7. These were also the only questions in which the scores were correlated with the ICON score. For question 1 those dissatisfied with the arrangement of their teeth were more likely to require treatment according to the ICON; similarly for question 2 those who wanted their teeth to be straightened were more likely to have a clinical need according to the ICON. For question 7, 49 per cent of those who thought they needed treatment did so; 26 per cent of those who were unsure needed treatment, and 26 per cent of those who said they did not need treatment were judged to need it. There were differences between boys and girls for questions 1, 2, 4, and 7. There was a consistent pattern: girls were more likely than boys to be dissatisfied and judge that they needed treatment.

Statistically significant differences between schools, taking gender into account, occurred only for question 4. Children in Ventspils were more likely to be dissatisfied with their dental health—over 42 per cent recorded dissatisfaction compared with an overall figure of 18 per cent. The largest negative correlation was between questions 1 and 2, i.e. that the individuals were dissatisfied with the appearance of their teeth and wanted them straightened.

A logistic regression was undertaken dichotomizing on the need for treatment based on the ICON scores. Questions 2 and 7 were selected using a forward variable selection method. Using these to predict need led to 69 per cent sensitivity with 53 per cent specificity. Thus, while the questions have some predictive power for assessing need, they are far from perfect.

Regarding treatment complexity (Table 1), the degree of difficulty did not vary significantly between schools (Very difficult ranging 1.3–10.4%). Only 10 per cent were considered 'Difficult or Very Difficult'.

## Discussion

The ICON is a relatively new index and is just beginning to be used more widely. It has been shown to be a

reliable and valid index (Koochek *et al.*, 2001; Firestone *et al.*, 2002) for assessing orthodontic treatment need. The mean level of treatment need of 35.3 per cent across all settings is similar to other studies in England and Wales (Brook and Shaw, 1989; Burden and Holmes, 1994; Office for Population Censuses and Surveys, 1994).

The results show considerable variation in the percentage of children in need of orthodontic treatment particularly between Riga and Daugavpils (27.5 per cent compared with 58.3 per cent, respectively). The reason for this is not understood, although the individuals making up the Daugavpils sample were 100 per cent of Russian origin compared with 12 per cent Russian and 88 per cent Latvian origins in Riga (determined by name). The ethnic difference warrants further investigation, as there is little information on the prevalence of malocclusion in Russia. As the same calibrated examiner obtained the data collected, bias was eliminated.

For question 1, 63 per cent of school children in Riga were either satisfied or very satisfied with the arrangement of their teeth compared with 67 per cent in Daugavpils. With regard to question 2, 63 per cent of school children in Riga wanted their teeth straightened compared with 70 per cent in Daugavpils. There were no statistically significant differences for either question 1 or 2 for the two schools.

Interestingly, the need for orthodontic treatment determined by the ICON score is related to the individual's subjective assessments of satisfaction of appearance and the perception of need to straighten their teeth. The needs of boys and girls were not found to be different but their self-perceived needs were different, with girls feeling more in need of treatment than boys.

The level of dental health as reported by children in Ventspils was poorer than in other schools but there were no significant differences between urban and rural settings.

The percentage of school children who had worn an orthodontic appliance was 18 per cent, which is approximately half that reported for 11–12 year olds in England and Wales (Office of Population Censuses and Surveys, 1994).

The ICON seems to be of use in assessing treatment need in a population and appears to be sensitive in

**Table 1** Distribution of orthodontic treatment complexity between the urban (U) and rural (R) settings using ICON.

| Settings       | Easy | Mild | Moderate | Difficult | Very difficult | Total number ( <i>n</i> ) |
|----------------|------|------|----------|-----------|----------------|---------------------------|
| Daugavpils (U) | 22.9 | 35.4 | 18.8     | 12.5      | 10.4           | 48                        |
| Riga (x2) (U)  | 36.9 | 44.3 | 14.8     | 2.7       | 1.3            | 149                       |
| Ventspils (U)  | 29.2 | 39.6 | 14.6     | 14.6      | 2.1            | 48                        |
| Jelgava (R)    | 33.3 | 48.1 | 9.3      | 5.6       | 3.7            | 54                        |
| Limbaži (R)    | 48.0 | 40.0 | 12.0     | 4.0       | 6.0            | 50                        |
| Madona (R)     | 40.0 | 34.0 | 16.0     | 4.0       | 6.0            | 50                        |
| Saldus (R)     | 37.5 | 39.3 | 14.3     | 7.1       | 1.9            | 56                        |
| Valmiera (R)   | 30.6 | 46.9 | 12.2     | 6.1       | 4.1            | 49                        |
| Overall (%)    | 34.3 | 41.7 | 14.1     | 6.2       | 3.8            |                           |

identifying differences in populations. The assessment of need and complexity can be used to plan orthodontic provision in a developing country such as Latvia.

### Conclusions

The overall prevalence of individuals needing orthodontic treatment in Latvia was 35.3 per cent, but this figure masks considerable variation between schools. For example, a greater need was found in Daugavpils than in Riga. This difference is not fully explained but could be genetic: the individuals in Daugavpils being mainly of Russian origin. The individuals' perception of the arrangement of teeth and the need for treatment correlated significantly with the ICON score.

### Address for correspondence

Professor S. Richmond  
Department of Dental Health and Biological Sciences  
University of Wales College of Medicine  
Dental School  
Cardiff CF14 4XY, UK

### Acknowledgements

The authors would like to thank all the school children and school administrators for participating in this study. We also acknowledge the financial support of the European Orthodontic Society to Dr A. Liepa.

### References

- Albino J E, Lewis E A, Slakter M J 1978 Examiner reliability for two methods of assessing malocclusion. *Angle Orthodontist* 48: 297–302
- Banack A R, Cleall J F, Yip A S 1972 Epidemiology of malocclusion in 12 year old Winnipeg school children. *Journal of the Canadian Dental Association* 38: 437–55
- Birkeland K, Bøe O E, Wisth P J 1996 Orthodontic concern among 11-year-old children and their parents compared with orthodontic treatment need assessed by Index of Orthodontic Treatment Need. *American Journal of Orthodontics and Dentofacial Orthopedics* 110: 197–205
- Brook P H, Shaw W C 1989 The development of an index of orthodontic treatment priority. *European Journal of Orthodontics* 11: 309–320
- Burden D J, Holmes A 1994 The need for orthodontic treatment in the child population of the United Kingdom. *European Journal of Orthodontics* 16: 395–399
- Daniels C P, Richmond S 2000 The development of the index of complexity, outcome and need (ICON). *Journal of Orthodontics* 27: 149–162
- Espeland L V, Ivarsson K, Stenvik A 1992 A new Norwegian index of orthodontic treatment need related to orthodontic concern among 11-year-olds and their parents. *Community Dentistry and Oral Epidemiology* 5: 274–279
- Firestone A R, Beck, F M, Beglin F M, Vig K W 2002 Validity of the Index of Complexity, Outcome, and Need (ICON) in determining orthodontic treatment need. *Angle Orthodontist* 72: 15–20
- Järvinen S, Väättäjä P 1987 Variability in assessment of need for orthodontic treatment when using certain treatment-need indices. *Community Dentistry and Oral Epidemiology* 15: 245–248
- Koochek A R, Yeh M S, Rolfe B, Richmond S 2001 The relationship between Index of Complexity, Outcome and Need, and patients' perceptions of malocclusion: a study in general dental practice. *British Dental Journal* 191: 325–329
- Office of Population Censuses and Surveys, Social Survey Division 1994 Children's dental health in England and Wales 1993. Her Majesty's Stationery Office, London
- Richmond S 1993 Personal audit in orthodontics. *British Journal of Orthodontics* 20: 131–140
- Richmond S 2000 The need for cost-effectiveness. *Journal of Orthodontics* 27: 267–269
- Richmond S, Andrews M 1993 Orthodontic treatment standards in Norway. *European Journal of Orthodontics* 15: 7–15
- Richmond S, Daniels C P 1998a International comparisons of professional assessments in orthodontics: Part 1—Treatment need. *American Journal of Orthodontics and Dentofacial Orthopedics* 113: 180–185
- Richmond S, Daniels C P 1998b International comparisons of professional assessments in orthodontics: Part 2—treatment outcome. *American Journal of Orthodontics and Dentofacial Orthopedics* 113: 324–328
- Shaw W C, O'Brien K D, Richmond S 1991 Quality control in orthodontics: factors influencing the receipt of orthodontic treatment. *British Dental Journal* 170: 66–68
- Vally I 1997 A comparison of lay and professional opinion on treatment need and treatment outcome. Thesis, University of Wales
- World Health Organisation 1993 International collaboration study of oral health outcomes (ICS II): study in Latvia. World Health Organisation, Copenhagen



## Appendix 1 Index of Complexity, Outcome and Need (ICON) scoring criteria

### ICON

#### Index of Complexity, Outcome and Need

- Based on expert opinion of 97 practising specialist orthodontists from Germany, Greece, Hungary, Italy, Netherlands, Norway, Spain, United Kingdom and the USA
- For use on patients or dental casts
- A single assessment method to record complexity, outcome and need
- For use in clinical governance, audit, research and decision making
- 5 components, taking about one minute to measure

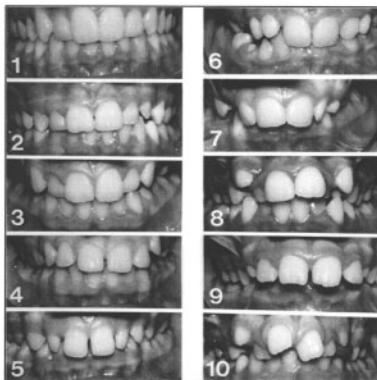

Component 1 Aesthetic Assessment

The Aesthetic Component was originally described as "SCAN" Evans R and Shaw WC 1987 A preliminary evaluation of an illustrated scale for rating dental attractiveness European Journal of Orthodontics 9:314-318.

- b) Possess less than or equal to 4mm of space between the adjacent permanent teeth. Use average canine and premolar widths to estimate the potential crowding in the mixed dentition, namely, 7mm for pre-molars, lower canine, and 8mm for upper canine
- Spacing in one part of the arch will cancel out crowding elsewhere
  - Retained deciduous teeth (without permanent successor) and erupted supernumerary teeth score as space (unless they are to be retained to obviate the need for prosthesis)
  - Lost teeth due to trauma or extraction should be counted as space (unless space is maintained for a prosthetic replacement).

#### COMPONENT 3 CROSSBITE

- Anterior and posterior transverse discrepancies of cusp to cusp or greater in intercuspal position

#### COMPONENT 4 INCISOR OPEN BITE / OVERBITE

- Open bite (except developmental conditions) is measured to the mid-incisal edges
- Deep bite is measured to deepest part of overbite
- If both traits are present only the highest score is counted

#### COMPONENT 5 BUCCAL SEGMENT ANTERO-POSTERIOR

- Quality of buccal segment interdigitation is measured (not Angles classification)
- Both sides are scored then added together

#### B. ICON SCORING PROTOCOL

- Measure all 5 traits according to the protocol above to obtain a set of scores
- Multiply the scores by their respective weights
- The sum of the weighted scores is the ICON score for the case
- Pre-treatment scores give the treatment need and complexity grades
- End of treatment scores gives the acceptability
- Pre-treatment - 4 x post treatment scores gives the degree of improvement

#### A. ICON SCORING METHOD

| COMPONENT                         | SCORE                                      |                                                        |                         |               |              |                | Weight |
|-----------------------------------|--------------------------------------------|--------------------------------------------------------|-------------------------|---------------|--------------|----------------|--------|
|                                   | 0                                          | 1                                                      | 2                       | 3             | 4            | 5              |        |
| 1 Aesthetic assessment            | Score 1 to 10                              |                                                        |                         |               |              |                | 7      |
| 2 Upper arch crowding             | < 2mm                                      | 2.1 to 5mm                                             | 5.1 to 9mm              | 9.1 to 13mm   | 13.1 to 17mm | > 17mm         | 5      |
| Upper spacing                     | < 2mm                                      | 2.1 to 5mm                                             | 5.1 to 9mm              | >9mm          |              | Impacted teeth | 5      |
| 3 Crossbite                       | No crossbite                               | crossbite present                                      |                         |               |              |                | 5      |
| 4 Incisor open bite               | Edge to edge                               | < 1mm                                                  | 1.1 to 2mm              | 2.1 to 4mm    | >4mm         |                | 4      |
| Incisor overbite                  | < 1/3 lower incisor coverage               | 1/3 to 2/3 coverage                                    | 2/3 up to fully covered | Fully covered |              |                | 4      |
| 5 Buccal segment antero-posterior | Cusp to embrasure only. Class I, II or III | Any cusp relation up to but not including cusp to cusp | Cusp to cusp            |               |              |                | 3      |

#### COMPONENT 1 AESTHETIC ASSESSMENT

Ten pictures ranking dental attractiveness

#### COMPONENT 2 UPPER ARCH CROWDING / SPACING

- The difference between the sum of the mesio-distal tooth diameters and the available arch circumference in the upper arch reduced to a 5 point score
  - Impacted teeth in either arch immediately score 5
- Impacted teeth must be unerupted and either:**
- Ectopic or impacted against an adjacent tooth (excluding third molars but including supernumerary teeth)

#### C. INTERPRETATION OF ICON SCORES

| NEED AND ACCEPTABILITY      | THRESHOLD           |
|-----------------------------|---------------------|
| Pre-treatment need          | > 43 treatment need |
| End treatment acceptability | < 31 acceptable     |

| COMPLEXITY GRADE (PRE-TREATMENT) | SCORE RANGE |
|----------------------------------|-------------|
| Easy                             | < 29        |
| Mild                             | 29 to 50    |
| Moderate                         | 51 to 63    |
| Difficult                        | 64 to 77    |
| Very difficult                   | > 77        |

| IMPROVEMENT GRADE                                | SCORE RANGE |
|--------------------------------------------------|-------------|
| (PRE-TREATMENT SCORE - 4 x POST-TREATMENT SCORE) |             |
| Greatly improved                                 | > -1        |
| Substantially improved                           | -25 to -1   |
| Moderately improved                              | -53 to -26  |
| Minimally improved                               | -85 to -54  |
| Not improved or worse                            | < -85       |

ICON<sup>®</sup> Copyright University of Wales College of Medicine

**Appendix 2 Questionnaire****1. Are you satisfied with the arrangement of your teeth?**

|                |           |               |              |                   |
|----------------|-----------|---------------|--------------|-------------------|
| Very satisfied | Satisfied | I do not care | Dissatisfied | Very dissatisfied |
| 1              | 2         | 3             | 4            | 5                 |

**2. Do you want your teeth straightened?**

|                 |               |                  |                    |
|-----------------|---------------|------------------|--------------------|
| Yes, definitely | yes, probably | no, probably not | no, definitely not |
| 1               | 2             | 3                | 4                  |

**3. Do you consider well aligned teeth important for overall facial appearance?**

|                |                  |               |                      |
|----------------|------------------|---------------|----------------------|
| Very important | rather important | not important | not important at all |
| 1              | 2                | 3             | 4                    |

**4. How satisfied are you with your dental health?**

|                |           |              |               |               |
|----------------|-----------|--------------|---------------|---------------|
| Very satisfied | Satisfied | Dissatisfied | I do not care | I do not know |
| 1              | 2         | 3            | 4             | 5             |

**5. How often do you brush your teeth?**

|                     |            |                      |                       |
|---------------------|------------|----------------------|-----------------------|
| Several times a day | Once a day | At least once a week | Less than once a week |
| 1                   | 2          | 3                    | 4                     |

**6. Have you ever worn an orthodontic appliance?**

|     |    |               |
|-----|----|---------------|
| Yes | No | I do not know |
| 1   | 2  | 3             |

**If yes who suggested treatment?**

|        |            |         |        |               |
|--------|------------|---------|--------|---------------|
| Myself | My parents | Dentist | Friend | I do not know |
| 1      | 2          | 3       | 4      | 5             |

**7. Have you ever thought you are in need of treatment?**

|     |    |               |
|-----|----|---------------|
| Yes | No | I do not know |
| 1   | 2  | 3             |

**If yes, please give the main reason for your concern?**

|                                       |                                             |                                |                   |               |
|---------------------------------------|---------------------------------------------|--------------------------------|-------------------|---------------|
| Appearance of teeth is unsatisfactory | Function of the dentition is unsatisfactory | Cleaning of teeth is difficult | Some other reason | I do not know |
| 1                                     | 2                                           | 3                              | 4                 | 5             |
